# Supplementary material for: A Molybdenum(VI) Complex of 5-(2-pyridyl-1-oxide)tetrazole: Synthesis, Structure, and Transformation into a MoO3-Based Hybrid Catalyst for the Epoxidation of Bio-Olefins
Source: MDPI journal article supplement (doi:10.3390/catal13030565), 2023-03-10
Supplement: s1 [file s1]

## Supplementary Materials

**Table S1.** Hydrogen bonding geometry (distances in Å and angles in degrees) for Hpto.

| $D-H\cdots A^a$                    | $d(D\cdots A)$ | $\angle(DHA)$ |
|------------------------------------|----------------|---------------|
| C1–H1 $\cdots$ N7                  | 3.278(7)       | 129           |
| C2–H2 $\cdots$ N8 <sup>i</sup>     | 3.425(7)       | 150           |
| C9–H9 $\cdots$ N3 <sup>ii</sup>    | 3.400(7)       | 138           |
| C11–H11 $\cdots$ N4 <sup>iii</sup> | 3.502(7)       | 155           |
| N2–H2A $\cdots$ O1                 | 2.634(5)       | 117           |
| N2–H2A $\cdots$ O1 <sup>iv</sup>   | 2.784(6)       | 148           |
| N10–H10N $\cdots$ O2               | 2.630(5)       | 117           |
| N10–H10N $\cdots$ O2 <sup>v</sup>  | 2.731(6)       | 144           |

<sup>a</sup> Symmetry codes used to generate equivalent atoms: (i)  $x, y+1, z$ ; (ii)  $-x+3/2, y+1/2, -z+3/2$ ; (iii)  $x+1/2, -y+3/2, z-1/2$ ; (iv)  $-x+3/2, y-1/2, -z+3/2$ ; (v)  $-x+3/2, y-1/2, -z+1/2$ .

**Table S2.** Hydrogen bonding geometry (distances in Å and angles in degrees) for compound [MoO<sub>2</sub>Cl<sub>2</sub>(Hpto)]·THF (**1**).

| $D-H\cdots A^a$                     | $d(D\cdots A)$ | $\angle(DHA)$ |
|-------------------------------------|----------------|---------------|
| N3–H3A $\cdots$ O4                  | 2.619(2)       | 173           |
| C5–H5 $\cdots$ Cl1 <sup>i</sup>     | 3.528(2)       | 128           |
| C5–H5 $\cdots$ O2 <sup>i</sup>      | 3.284(2)       | 137           |
| C6–H6 $\cdots$ Cl1 <sup>i</sup>     | 3.569(2)       | 124           |
| C10–H10B $\cdots$ Cl1 <sup>ii</sup> | 3.760(3)       | 142           |

<sup>a</sup> Symmetry codes used to generate equivalent atoms: (i)  $-x+1, -y+1, -z$ ; (ii)  $x, -y+3/2, z+1/2$ .

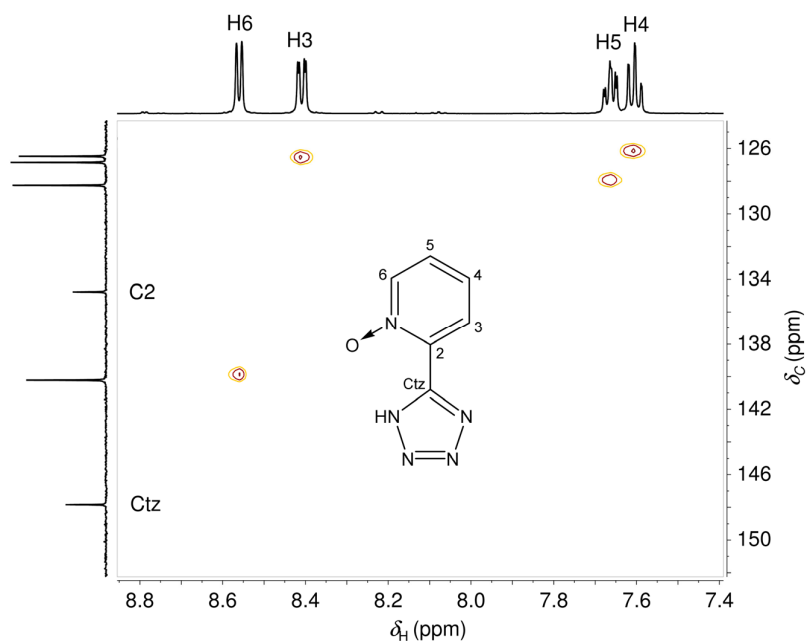

**Figure S1.** <sup>1</sup>H-<sup>13</sup>C HSQC NMR spectrum of Hpto in DMSO-*d*<sub>6</sub>.

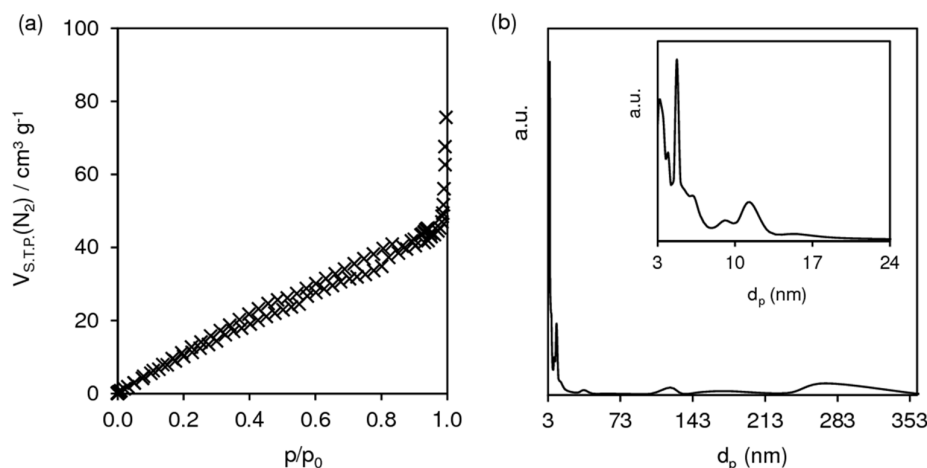

**Figure S2.** (a)  $N_2$  sorption isotherm and (b) pore size distribution of **2**. The inset is an amplification of the pore size range up to 24 nm.

### Single-crystal X-ray diffraction studies

Single crystals of Hpto and **1** were manually collected from the crystallization vials and immersed in highly viscous FOMBLIN Y perfluoropolyether vacuum oil (LVAC 140/13, Sigma-Aldrich) to avoid degradation caused by the evaporation of the solvent [71]. Crystals were mounted on either Hampton Research CryoLoops or MiTeGen MicroLoops, typically with the help of a Stemi 2000 stereomicroscope equipped with Carl Zeiss lenses.

Crystal data for Hpto were collected at 150(2) K on a Bruker D8 QUEST equipped with a Mo  $K\alpha$  sealed tube ( $\lambda = 0.71073 \text{ \AA}$ ), a multilayer TRIUMPH X-ray mirror, a PHOTON 100 CMOS detector, and an Oxford Cryosystems 700+ Series Cryostream cooler. Data for **1** were collected at 150(2) K on a Bruker X8 Kappa APEX II CCD area-detector diffractometer (Mo  $K\alpha$  graphite-monochromated radiation,  $\lambda = 0.71073 \text{ \AA}$ ) controlled by APEX3 software [72] and equipped with an Oxford Cryosystems 700 Series Cryostream cooler monitored remotely using the software interface Cryopad [73]. Diffraction images were processed using SAINT+ [74], and data were corrected for absorption by the multiscan semi-empirical method implemented in SADABS 2016/2 [75].

The structures were solved using the algorithm implemented in SHELXT-2014/5 [76], which allowed the immediate location of almost all the heaviest atoms composing their molecular units. The remaining missing and misplaced non-hydrogen atoms were located from difference Fourier maps calculated from successive full-matrix least-squares refinement cycles on  $F^2$  using the latest SHELXL from the 2018/3 release [77]. All structural refinements were performed using the graphical interface ShelXle [78].

Hydrogen atoms bound to carbon were placed at their idealized positions using *HFIX* instructions in SHELXL: 43 (for aromatic carbon atoms and  $-\text{NH}$  groups) and 23 (for the  $-\text{CH}_2-$  groups). These hydrogen atoms were included in subsequent refinement cycles with isotropic thermal displacement parameters ( $U_{\text{iso}}$ ) fixed at  $1.2 \times U_{\text{eq}}$  of the parent carbon atoms.

The last difference Fourier map synthesis showed, for Hpto, the highest peak ( $0.34 \text{ e\AA}^{-3}$ ) and the deepest hole ( $-0.34 \text{ e\AA}^{-3}$ ) located at 0.91 and 1.13  $\text{\AA}$  from C6 and N9, respectively, and, for **1**, the highest peak ( $0.46 \text{ e\AA}^{-3}$ ) and the deepest hole ( $-0.55 \text{ e\AA}^{-3}$ ) located at 0.86 and 0.65  $\text{\AA}$  from C7 and Mo1, respectively. Table S3 lists the relevant crystal data and structure refinement parameters. Structural drawings were created using Crystal Impact Diamond [79]. CCDC 2193086 (Hpto) and 2193085 (**1**) contain the supplementary crystallographic data (including structure factors) for this paper. These data can be obtained free of charge from The Cambridge Crystallographic Data Centre via [www.ccdc.cam.ac.uk/structures](http://www.ccdc.cam.ac.uk/structures).

**Table S3.** Crystal data and structure refinement details for the organic ligand Hpto and complex [MoO<sub>2</sub>Cl<sub>2</sub>(Hpto)]·THF (**1**).

|                                                                             | <b>Hpto</b>                                                     | <b>1</b>                                                                        |
|-----------------------------------------------------------------------------|-----------------------------------------------------------------|---------------------------------------------------------------------------------|
| Formula                                                                     | C <sub>12</sub> H <sub>10</sub> N <sub>10</sub> O <sub>2</sub>  | C <sub>10</sub> H <sub>13</sub> Cl <sub>2</sub> MoN <sub>5</sub> O <sub>4</sub> |
| Formula weight                                                              | 326.30                                                          | 434.09                                                                          |
| Temperature / K                                                             | 150(2)                                                          | 150(2)                                                                          |
| Crystal system                                                              | Monoclinic                                                      | Monoclinic                                                                      |
| Space group                                                                 | <i>P</i> 2 <sub>1</sub> /n                                      | <i>P</i> 2 <sub>1</sub> /c                                                      |
| <i>a</i> / Å                                                                | 19.165(7)                                                       | 9.4102(16)                                                                      |
| <i>b</i> / Å                                                                | 3.6461(14)                                                      | 9.3032(15)                                                                      |
| <i>c</i> / Å                                                                | 19.599(7)                                                       | 18.550(3)                                                                       |
| $\alpha$ / °                                                                | 90                                                              | 90                                                                              |
| $\beta$ / °                                                                 | 98.968(7)                                                       | 102.399(2)                                                                      |
| $\gamma$ / °                                                                | 90                                                              | 90                                                                              |
| Volume / Å <sup>3</sup>                                                     | 1352.8(9)                                                       | 1586.1(5)                                                                       |
| <i>Z</i>                                                                    | 4                                                               | 4                                                                               |
| $\mu$ (Mo K $\alpha$ ) / mm <sup>-1</sup>                                   | 0.12                                                            | 1.19                                                                            |
| Crystal type                                                                | Yellow plate                                                    | Colorless block                                                                 |
| Crystal size / mm                                                           | 0.27×0.09×0.02                                                  | 0.32×0.30×0.22                                                                  |
| $\theta$ range (°)                                                          | 2.77–25.31                                                      | 2.80–29.16                                                                      |
| Index ranges                                                                | –23 ≤ <i>h</i> ≤ 23<br>–4 ≤ <i>k</i> ≤ 4<br>–23 ≤ <i>l</i> ≤ 23 | –12 ≤ <i>h</i> ≤ 12<br>–10 ≤ <i>k</i> ≤ 12<br>–22 ≤ <i>l</i> ≤ 25               |
| Collected reflections                                                       | 14968                                                           | 11445                                                                           |
| Independent reflections                                                     | 2435 ( <i>R</i> <sub>int</sub> = 0.052)                         | 4262 ( <i>R</i> <sub>int</sub> = 0.020)                                         |
| Completeness to $\theta$ = 25.24°                                           | 98.0%                                                           | 99.6%                                                                           |
| Final <i>R</i> indices [ <i>I</i> > 2 $\sigma$ ( <i>I</i> )] <sup>a–c</sup> | <i>R</i> 1 = 0.0873<br><i>wR</i> 2 = 0.2397                     | <i>R</i> 1 = 0.0237<br><i>wR</i> 2 = 0.0579                                     |
| Final <i>R</i> indices (all data)                                           | <i>R</i> 1 = 0.0973<br><i>wR</i> 2 = 0.2353                     | <i>R</i> 1 = 0.0288<br><i>wR</i> 2 = 0.0557                                     |
| Largest diff. peak and hole / eÅ <sup>-3</sup>                              | 0.34 and –0.34                                                  | 0.46 and –0.55                                                                  |

<sup>a</sup> 
$$R1 = \sum ||F_o| - |F_c|| / \sum |F_o|$$

<sup>b</sup> 
$$wR2 = \sqrt{\sum [w(F_o^2 - F_c^2)^2] / \sum [w(F_o^2)^2]}$$

<sup>c</sup> 
$$w = 1 / \left[ \sigma^2(F_o^2) + (mP)^2 + nP \right] \text{ where } P = (F_o^2 + 2F_c^2) / 3$$

#
